# Supplementary material for: Systematic optimization and evaluation of sample pretreatment methods for LC-MS-based metabolomics analysis of adherent mammalian cancer cells
Source: Royal Society of Chemistry journal article supplement (doi:10.1039/c9ay00792j), 2019-01-01
Supplement: c9ay00792j1.pdf [file c9ay00792j1.pdf]

## Supplementary Information

### **Systematic optimization and evaluation of sample pretreatment methods for LC-MS-based metabolomics analysis of adherent mammalian cancer cells**

Xiaoyu Xu<sup>a</sup>, Qingce Zang<sup>a</sup>, Rui Zhang<sup>a</sup>, Jiaying Liu<sup>a</sup>, Jiuming He<sup>a</sup>, Ruiping Zhang<sup>a\*</sup>, Zeper Abliz<sup>a,b</sup>

<sup>a</sup>State Key Laboratory of Bioactive Substance and Function of Natural Medicines, Institute of Materia Medica, Chinese Academy of Medical Sciences and Peking Union Medical College, Beijing 100050, China.

<sup>b</sup>Centre for Bioimaging and Systems Biology, Minzu University of China, Beijing 100081, China.

**The specific steps in each extraction protocol are detailed below.**

In method E1, two 100% methanol extractions (500  $\mu$ L each time) followed by an extraction with 250  $\mu$ L of pure water were performed to extract metabolites. In method E2, a first extraction using 500  $\mu$ L of acidic methanol (0.1% acetic acid) followed by an extraction with 500  $\mu$ L of normal methanol and a final extraction with 500  $\mu$ L of basic methanol (0.1% ammonium hydroxide) were performed. In method E3, cell pellets were resuspended in 1 mL of 100% methanol, vortexed at 3000 rpm for 3 minutes and incubated on ice for 10 minutes. In method E4, cell pellets were resuspended in 1 mL of ice-cold 50% aqueous acetonitrile, vortexed at 3000 rpm for 3 minutes and incubated on ice for 10 minutes. In method E5, cell pellets were resuspended in 1 mL of ice-cold 75% ethanol, vortexed at 3000 rpm for 3 minutes and incubated on ice for 10 minutes. In method E6, cell pellets were resuspended in 1 mL of 80% aqueous methanol, vortexed, incubated at 70 °C for 10 minutes, and then cooled on ice for 5 minutes. In method E7, cell pellets were resuspended in 1 mL of 75% aqueous ethanol, vortexed at 3000 rpm for 3 minutes, incubated at 70 °C for 5 minutes, and then cooled on ice for 5 minutes.

Table S1. Design of the optimization methods for each step.

| Analyzed Content         | Collection Batch                                 | Quenching Time                               | Quenching Solvent | Cell Disruption Method | Extraction Solvent         | Liquid Nitrogen Storage Time |
|--------------------------|--------------------------------------------------|----------------------------------------------|-------------------|------------------------|----------------------------|------------------------------|
| 1 Sample Collection      | A20170112<br>A20170117<br>B20170112<br>B20170117 | 5 min                                        | Q3                | D2                     | E1                         | 0 days                       |
| 2 Quenching Time         | same batch                                       | 0 min, 5 min, 10 min, 15 min, 20 min, 30 min | Q3                | D2                     | E1                         | 0 days                       |
| 3 Quenching Solvent      | same batch                                       | 5 min                                        | Q1, Q2, Q3, Q4    | D2                     | E1                         | 0 days                       |
| 4 Cell Disruption Method | same batch                                       | 5 min                                        | Q3                | D1, D2, D3             | E1                         | 0 days                       |
| 5 Extraction Solvent     | same batch                                       | 5 min                                        | Q3                | D2                     | E1, E2, E3, E4, E5, E6, E7 | 0 days                       |
| 6 Sample Storage         | same batch                                       | 5 min                                        | Q3                | D2                     | E1                         | 0 days and 10 months         |

Table S2. Endogenous metabolites used to evaluate the different methods and method validation.

|                  | No. | Compound                      | Formula                                                       | [M+H] <sup>+</sup><br>[M-H] <sup>-</sup> | RT (min) | Instrument<br>precision | Intra-day<br>precision | Inter-day<br>precision |
|------------------|-----|-------------------------------|---------------------------------------------------------------|------------------------------------------|----------|-------------------------|------------------------|------------------------|
| Amino acids (19) | 1   | L-valine <sup>a</sup>         | C <sub>5</sub> H <sub>11</sub> NO <sub>2</sub>                | 118.0864                                 | 1.22     | 7.64%                   | 5.40%                  | 7.21%                  |
|                  | 2   | L-isoleucine <sup>a</sup>     | C <sub>6</sub> H <sub>13</sub> NO <sub>2</sub>                | 132.1018                                 | 1.88     | 5.13%                   | 8.07%                  | 11.26%                 |
|                  | 3   | L-leucine <sup>a</sup>        | C <sub>6</sub> H <sub>13</sub> NO <sub>2</sub>                | 132.1018                                 | 2.24     | 4.88%                   | 4.50%                  | 5.07%                  |
|                  | 4   | L-threonine <sup>a</sup>      | C <sub>4</sub> H <sub>9</sub> NO <sub>3</sub>                 | 120.0658                                 | 1.09     | 7.72%                   | 8.31%                  | 10.92%                 |
|                  | 5   | L-tyrosine <sup>a</sup>       | C <sub>9</sub> H <sub>11</sub> NO <sub>3</sub>                | 182.0811                                 | 1.19     | 4.38%                   | 8.93%                  | 10.02%                 |
|                  | 6   | L-phenylalanine <sup>a</sup>  | C <sub>9</sub> H <sub>11</sub> NO <sub>2</sub>                | 166.0862                                 | 4.08     | 6.33%                   | 4.31%                  | 10.27%                 |
|                  | 7   | L-glutamine <sup>a</sup>      | C <sub>5</sub> H <sub>10</sub> N <sub>2</sub> O <sub>3</sub>  | 147.0764                                 | 1.04     | 6.36%                   | 10.67%                 | 9.95%                  |
|                  | 8   | L-tryptophan <sup>a</sup>     | C <sub>11</sub> H <sub>12</sub> N <sub>2</sub> O <sub>2</sub> | 205.0972                                 | 5.00     | 4.28%                   | 2.82%                  | 3.97%                  |
|                  | 9   | L-proline <sup>a</sup>        | C <sub>5</sub> H <sub>9</sub> NO <sub>2</sub>                 | 116.0706                                 | 1.23     | 3.08%                   | 4.07%                  | 10.48%                 |
|                  | 10  | L-glutamic acid <sup>a</sup>  | C <sub>5</sub> H <sub>9</sub> NO <sub>4</sub>                 | 148.0603                                 | 1.21     | 5.11%                   | 8.31%                  | 12.02%                 |
|                  | 11  | L-aspartic acid <sup>a</sup>  | C <sub>4</sub> H <sub>7</sub> NO <sub>4</sub>                 | 134.0447                                 | 1.21     | 8.21%                   | 6.20%                  | 6.53%                  |
|                  | 12  | L-arginine <sup>a</sup>       | C <sub>6</sub> H <sub>14</sub> N <sub>4</sub> O <sub>2</sub>  | 175.1188                                 | 1.16     | 8.93%                   | 16.15%                 | 17.43%                 |
|                  | 13  | L-histidine <sup>a</sup>      | C <sub>6</sub> H <sub>9</sub> N <sub>3</sub> O <sub>2</sub>   | 156.0766                                 | 1.08     | 8.49%                   | 11.57%                 | 11.72%                 |
|                  | 14  | Creatine <sup>a</sup>         | C <sub>4</sub> H <sub>9</sub> N <sub>3</sub> O <sub>2</sub>   | 132.0768                                 | 1.24     | 7.80%                   | 5.67%                  | 5.94%                  |
|                  | 15  | L-ornithine <sup>a</sup>      | C <sub>5</sub> H <sub>12</sub> N <sub>2</sub> O <sub>2</sub>  | 133.0973                                 | 0.94     | 8.22%                   | 6.67%                  | 11.94%                 |
|                  | 16  | L-methionine <sup>a</sup>     | C <sub>5</sub> H <sub>11</sub> NO <sub>2</sub> S              | 150.0583                                 | 1.19     | 9.04%                   | 13.82%                 | 18.20%                 |
|                  | 17  | L-serine <sup>a</sup>         | C <sub>3</sub> H <sub>7</sub> NO <sub>3</sub>                 | 106.0499                                 | 1.13     | 8.32%                   | 9.08%                  | 8.51%                  |
|                  | 18  | Taurine <sup>a</sup>          | C <sub>2</sub> H <sub>7</sub> NO <sub>3</sub> S               | 126.0219                                 | 1.26     | 7.51%                   | 9.89%                  | 10.24%                 |
|                  | 19  | Dimethylarginine <sup>a</sup> | C <sub>8</sub> H <sub>18</sub> N <sub>4</sub> O <sub>2</sub>  | 203.1503                                 | 1.29     | 8.18%                   | 8.03%                  | 12.48%                 |
| Carnitines (10)  | 20  | Carnitine C0 <sup>a</sup>     | C <sub>7</sub> H <sub>15</sub> NO <sub>3</sub>                | 162.1123                                 | 1.19     | 9.68%                   | 6.71%                  | 7.88%                  |
|                  | 21  | Carnitine C2:0 <sup>a</sup>   | C <sub>9</sub> H <sub>17</sub> NO <sub>4</sub>                | 204.1230                                 | 1.84     | 6.09%                   | 7.34%                  | 10.10%                 |
|                  | 22  | Carnitine C3:0 <sup>b</sup>   | C <sub>10</sub> H <sub>19</sub> NO <sub>4</sub>               | 218.1387                                 | 3.54     | 9.92%                   | 6.87%                  | 13.02%                 |
|                  | 23  | Carnitine C4:0 <sup>b</sup>   | C <sub>11</sub> H <sub>21</sub> NO <sub>4</sub>               | 232.1543                                 | 4.70     | 5.46%                   | 8.04%                  | 9.85%                  |
|                  | 24  | Carnitine C5:0 <sup>b</sup>   | C <sub>12</sub> H <sub>23</sub> NO <sub>4</sub>               | 246.1700                                 | 5.58     | 9.22%                   | 8.07%                  | 8.39%                  |
|                  | 25  | Carnitine C6:0 <sup>b</sup>   | C <sub>13</sub> H <sub>25</sub> NO <sub>4</sub>               | 260.1856                                 | 6.89     | 5.20%                   | 9.56%                  | 10.23%                 |
|                  | 26  | Carnitine C8:0 <sup>b</sup>   | C <sub>15</sub> H <sub>29</sub> NO <sub>4</sub>               | 288.2169                                 | 8.72     | 5.99%                   | 6.90%                  | 7.07%                  |
|                  | 27  | Carnitine C10:0 <sup>b</sup>  | C <sub>17</sub> H <sub>33</sub> NO <sub>4</sub>               | 316.2482                                 | 10.24    | 7.87%                   | 7.32%                  | 7.75%                  |
|                  | 28  | Carnitine C12:0 <sup>b</sup>  | C <sub>19</sub> H <sub>38</sub> NO <sub>4</sub>               | 344.2795                                 | 11.98    | 8.57%                   | 6.75%                  | 12.45%                 |
|                  | 29  | Carnitine C14:1 <sup>b</sup>  | C <sub>21</sub> H <sub>39</sub> NO <sub>4</sub>               | 370.2946                                 | 12.47    | 11.13%                  | 11.69%                 | 13.26%                 |

|                       |    |                                |                                                                |          |       |        |        |        |
|-----------------------|----|--------------------------------|----------------------------------------------------------------|----------|-------|--------|--------|--------|
| Nucleotides (14)      | 30 | Cytosine <sup>a</sup>          | C <sub>4</sub> H <sub>5</sub> N <sub>3</sub> O                 | 112.0505 | 1.67  | 5.21%  | 7.86%  | 10.46% |
|                       | 31 | Uracil <sup>a</sup>            | C <sub>4</sub> H <sub>4</sub> N <sub>2</sub> O <sub>2</sub>    | 113.0345 | 1.71  | 3.65%  | 6.29%  | 12.09% |
|                       | 32 | Hypoxanthine <sup>a</sup>      | C <sub>5</sub> H <sub>4</sub> N <sub>4</sub> O                 | 137.0458 | 2.02  | 6.31%  | 6.51%  | 12.21% |
|                       | 33 | Xanthine <sup>a</sup>          | C <sub>5</sub> H <sub>4</sub> N <sub>4</sub> O <sub>2</sub>    | 153.0407 | 1.69  | 6.00%  | 8.79%  | 12.80% |
|                       | 34 | Guanine <sup>a</sup>           | C <sub>5</sub> H <sub>5</sub> N <sub>5</sub> O                 | 152.0567 | 1.72  | 7.83%  | 8.85%  | 12.71% |
|                       | 35 | 1-Methylguanine <sup>a</sup>   | C <sub>6</sub> H <sub>7</sub> N <sub>5</sub> O                 | 166.0723 | 2.16  | 7.56%  | 8.04%  | 9.60%  |
|                       | 36 | Cytidine <sup>a</sup>          | C <sub>9</sub> H <sub>13</sub> N <sub>3</sub> O <sub>5</sub>   | 244.0928 | 1.68  | 8.22%  | 12.00% | 13.71% |
|                       | 37 | Uridine <sup>a</sup>           | C <sub>9</sub> H <sub>12</sub> N <sub>2</sub> O <sub>6</sub>   | 245.0768 | 2.58  | 11.88% | 9.28%  | 9.27%  |
|                       | 38 | Adenosine <sup>a</sup>         | C <sub>10</sub> H <sub>13</sub> N <sub>5</sub> O <sub>4</sub>  | 268.1040 | 3.41  | 5.95%  | 12.73% | 14.15% |
|                       | 39 | Xanthosine <sup>a</sup>        | C <sub>10</sub> H <sub>12</sub> N <sub>4</sub> O <sub>6</sub>  | 285.0830 | 3.70  | 11.36% | 8.49%  | 9.83%  |
|                       | 40 | Guanosine <sup>a</sup>         | C <sub>10</sub> H <sub>13</sub> N <sub>5</sub> O <sub>5</sub>  | 284.0989 | 3.52  | 7.00%  | 8.57%  | 14.44% |
|                       | 41 | Succinyladenosine <sup>b</sup> | C <sub>14</sub> H <sub>17</sub> N <sub>5</sub> O <sub>8</sub>  | 384.1150 | 4.29  | 6.82%  | 5.85%  | 9.69%  |
|                       | 42 | UMP <sup>a</sup>               | C <sub>9</sub> H <sub>13</sub> N <sub>2</sub> O <sub>9</sub> P | 325.0431 | 1.80  | 7.64%  | 5.54%  | 15.75% |
|                       | 43 | CMP <sup>a</sup>               | C <sub>9</sub> H <sub>14</sub> N <sub>3</sub> O <sub>8</sub> P | 324.0591 | 1.79  | 7.82%  | 8.60%  | 10.51% |
| Lysophosphatides (12) | 44 | LPC (14:0) <sup>b</sup>        | C <sub>22</sub> H <sub>46</sub> NO <sub>7</sub> P              | 468.3085 | 12.03 | 8.06%  | 14.00% | 16.20% |
|                       | 45 | LPC (16:1) <sup>b</sup>        | C <sub>24</sub> H <sub>48</sub> NO <sub>7</sub> P              | 494.3241 | 12.71 | 6.06%  | 11.45% | 12.50% |
|                       | 46 | LPC (16:0) <sup>a</sup>        | C <sub>24</sub> H <sub>50</sub> NO <sub>7</sub> P              | 496.3398 | 15.04 | 5.50%  | 9.49%  | 9.49%  |
|                       | 47 | LPE (20:4) <sup>b</sup>        | C <sub>25</sub> H <sub>44</sub> NO <sub>7</sub> P              | 502.2928 | 13.69 | 5.51%  | 9.93%  | 10.36% |
|                       | 48 | LPC (17:1) <sup>b</sup>        | C <sub>25</sub> H <sub>50</sub> NO <sub>7</sub> P              | 508.3398 | 14.24 | 12.06% | 9.33%  | 11.49% |
|                       | 49 | LPC (18:2) <sup>b</sup>        | C <sub>26</sub> H <sub>50</sub> NO <sub>7</sub> P              | 520.3398 | 13.73 | 7.10%  | 11.10% | 12.99% |
|                       | 50 | LPC (18:1) <sup>a</sup>        | C <sub>26</sub> H <sub>52</sub> NO <sub>7</sub> P              | 522.3554 | 16.30 | 7.61%  | 12.78% | 18.35% |
|                       | 51 | LPC (18:0) <sup>b</sup>        | C <sub>26</sub> H <sub>54</sub> NO <sub>7</sub> P              | 524.3711 | 15.73 | 10.93% | 13.13% | 13.65% |
|                       | 52 | LPE (22:6) <sup>b</sup>        | C <sub>27</sub> H <sub>44</sub> NO <sub>7</sub> P              | 526.2928 | 13.18 | 6.42%  | 5.87%  | 19.24% |
|                       | 53 | LPC (20:5) <sup>b</sup>        | C <sub>28</sub> H <sub>48</sub> NO <sub>7</sub> P              | 542.3241 | 12.45 | 8.80%  | 5.79%  | 5.74%  |
|                       | 54 | LPC (20:4) <sup>b</sup>        | C <sub>28</sub> H <sub>50</sub> NO <sub>7</sub> P              | 544.3398 | 13.39 | 6.46%  | 6.69%  | 10.69% |
|                       | 55 | LPC (21:0) <sup>b</sup>        | C <sub>30</sub> H <sub>50</sub> NO <sub>7</sub> P              | 568.3398 | 13.76 | 9.61%  | 10.89% | 11.05% |
| Organic acids (13)    | 56 | Malonic acid <sup>b</sup>      | C <sub>3</sub> H <sub>4</sub> O <sub>4</sub>                   | 103.0037 | 1.89  | 8.72%  | 9.29%  | 11.50% |
|                       | 57 | Succinic acid <sup>a</sup>     | C <sub>4</sub> H <sub>6</sub> O <sub>4</sub>                   | 117.0193 | 2.30  | 9.88%  | 8.80%  | 13.07% |
|                       | 58 | Hippuric acid <sup>a</sup>     | C <sub>9</sub> H <sub>9</sub> NO <sub>3</sub>                  | 178.0510 | 5.86  | 9.90%  | 8.62%  | 13.40% |
|                       | 59 | Pantothenic acid <sup>a</sup>  | C <sub>9</sub> H <sub>17</sub> NO <sub>5</sub>                 | 218.1034 | 4.15  | 9.60%  | 13.22% | 12.35% |
|                       | 60 | Citric acid <sup>a</sup>       | C <sub>6</sub> H <sub>8</sub> O <sub>7</sub>                   | 191.0197 | 1.96  | 8.72%  | 9.93%  | 17.34% |
|                       | 61 | FAC 10:0-OH <sup>b</sup>       | C <sub>10</sub> H <sub>20</sub> O <sub>3</sub>                 | 187.1340 | 10.84 | 8.47%  | 9.90%  | 13.65% |

|    |                          |                                                |          |       |       |        |        |
|----|--------------------------|------------------------------------------------|----------|-------|-------|--------|--------|
| 62 | FAC 12:1-OH <sup>b</sup> | C <sub>12</sub> H <sub>22</sub> O <sub>3</sub> | 213.1496 | 11.42 | 8.42% | 9.89%  | 9.88%  |
| 63 | FAC 12:0-OH <sup>b</sup> | C <sub>12</sub> H <sub>24</sub> O <sub>3</sub> | 215.1653 | 11.00 | 5.39% | 8.53%  | 8.39%  |
| 64 | FAC 14:1-OH <sup>b</sup> | C <sub>14</sub> H <sub>26</sub> O <sub>3</sub> | 241.1809 | 14.84 | 9.08% | 9.70%  | 11.11% |
| 65 | FAC 16:0 <sup>b</sup>    | C <sub>16</sub> H <sub>32</sub> O <sub>2</sub> | 255.2330 | 23.54 | 9.51% | 8.42%  | 11.25% |
| 66 | FAC 18:1 <sup>b</sup>    | C <sub>18</sub> H <sub>34</sub> O <sub>2</sub> | 281.2486 | 23.74 | 5.56% | 9.54%  | 10.90% |
| 67 | FAC 18:0 <sup>b</sup>    | C <sub>18</sub> H <sub>36</sub> O <sub>2</sub> | 283.2643 | 24.84 | 9.20% | 10.27% | 18.54% |
| 68 | FAC 20:4 <sup>a</sup>    | C <sub>20</sub> H <sub>32</sub> O <sub>2</sub> | 303.2330 | 22.77 | 8.68% | 6.57%  | 9.84%  |

<sup>a</sup> Metabolites confirmed using standard compounds. <sup>b</sup> Metabolites identified by database searches and MS fragmentation. The data of amino acids, carnitines, nucleotides and lysophosphatides was acquired in ESI positive ion mode, and the data of organic acids was acquired in ESI negative ion mode.

Table S3 Comparison of mean normalized values of metabolites processed using different quenching solvents (Related to Fig. 3D).

| Classify         | Q1   |       | Q2   |       | Q3   |       | Q4   |       |
|------------------|------|-------|------|-------|------|-------|------|-------|
|                  | mean | CV %  |
| Amino acids      | 0.98 | 10.48 | 0.57 | 9.32  | 0.87 | 8.45  | 0.73 | 7.61  |
| Carnitines       | 0.30 | 9.49  | 0.32 | 15.21 | 0.31 | 13.19 | 0.41 | 14.48 |
| Nucleotides      | 0.49 | 14.01 | 0.53 | 34.20 | 0.56 | 15.25 | 0.58 | 13.71 |
| Lysophosphatides | 0.56 | 12.47 | 0.55 | 13.20 | 0.72 | 15.94 | 0.17 | 16.81 |
| Organic acids    | 0.40 | 11.48 | 0.37 | 17.82 | 0.44 | 11.97 | 0.45 | 17.16 |

Table S4 Comparison of mean normalized values of metabolites using different extraction protocols (Related to Fig. 5A).

| Classify         | E1   |       | E2   |       | E3   |       | E4   |       | E5   |       | E6   |       | E7   |       |
|------------------|------|-------|------|-------|------|-------|------|-------|------|-------|------|-------|------|-------|
|                  | mean | CV %  |
| Amino acids      | 0.52 | 8.93  | 0.27 | 24.48 | 0.23 | 12.06 | 0.29 | 6.09  | 0.27 | 6.88  | 0.31 | 5.37  | 0.27 | 7.50  |
| Carnitines       | 0.14 | 11.67 | 0.10 | 20.17 | 0.15 | 3.83  | 0.09 | 3.49  | 0.16 | 12.95 | 0.09 | 7.38  | 0.10 | 12.38 |
| Nucleotides      | 0.20 | 9.49  | 0.15 | 6.90  | 0.07 | 3.63  | 0.58 | 8.05  | 0.12 | 11.74 | 0.07 | 15.93 | 0.18 | 6.75  |
| Lysophosphatides | 0.37 | 8.34  | 0.24 | 20.68 | 0.51 | 12.77 | 0.31 | 10.89 | 0.33 | 14.03 | 0.33 | 16.13 | 0.29 | 5.09  |
| Organic acids    | 0.31 | 8.05  | 0.11 | 22.42 | 0.13 | 10.91 | 0.15 | 16.68 | 0.18 | 14.07 | 0.22 | 13.01 | 0.24 | 14.76 |

Table S5 Comparison of mean normalized values of nucleotides, nucleosides and nucleobases using different extraction protocols (Related to Fig. 5B).

| Classify          | E1   |       | E2   |       | E3   |       | E4   |       | E5   |       | E6   |       | E7   |       |
|-------------------|------|-------|------|-------|------|-------|------|-------|------|-------|------|-------|------|-------|
|                   | mean | CV %  |
| Guanosine         | 0.02 | 5.03  | 0.00 | 6.71  | 0.00 | 7.19  | 0.14 | 5.55  | 0.01 | 6.19  | 0.01 | 18.94 | 0.01 | 8.45  |
| Adenosine         | 0.03 | 8.93  | 0.00 | 15.82 | 0.00 | 6.80  | 0.14 | 11.59 | 0.00 | 12.14 | 0.01 | 29.58 | 0.01 | 8.79  |
| Succinyladenosine | 0.01 | 4.86  | 0.00 | 16.94 | 0.00 | 8.82  | 0.13 | 6.23  | 0.01 | 12.65 | 0.01 | 22.97 | 0.01 | 8.39  |
| Uridine           | 0.01 | 5.94  | 0.00 | 8.80  | 0.00 | 3.62  | 0.15 | 18.26 | 0.00 | 17.75 | 0.00 | 16.60 | 0.00 | 8.53  |
| Xanthosine        | 0.02 | 11.50 | 0.01 | 8.64  | 0.01 | 29.92 | 0.10 | 10.64 | 0.02 | 12.10 | 0.01 | 32.99 | 0.02 | 11.98 |
| Cytosine          | 0.04 | 3.88  | 0.03 | 20.07 | 0.01 | 2.38  | 0.05 | 2.85  | 0.02 | 6.07  | 0.01 | 15.07 | 0.04 | 9.05  |
| Cytidine          | 0.04 | 4.44  | 0.03 | 20.29 | 0.01 | 4.57  | 0.05 | 4.93  | 0.02 | 8.02  | 0.01 | 13.05 | 0.04 | 8.84  |
| Uracil            | 0.05 | 38.97 | 0.03 | 50.85 | 0.01 | 1.36  | 0.05 | 19.48 | 0.03 | 54.57 | 0.01 | 5.58  | 0.03 | 7.66  |
| Guanine           | 0.04 | 3.07  | 0.04 | 18.39 | 0.01 | 2.13  | 0.04 | 8.11  | 0.02 | 3.06  | 0.02 | 34.95 | 0.04 | 7.14  |
| Hypoxanthine      | 0.03 | 14.75 | 0.03 | 11.76 | 0.01 | 27.11 | 0.04 | 18.36 | 0.02 | 20.53 | 0.03 | 18.10 | 0.04 | 15.00 |
| UMP               | 0.04 | 4.82  | 0.04 | 31.12 | 0.03 | 5.04  | 0.00 | 8.33  | 0.04 | 9.16  | 0.01 | 13.91 | 0.04 | 8.79  |
| CMP               | 0.03 | 18.87 | 0.04 | 45.44 | 0.03 | 9.05  | 0.02 | 8.30  | 0.03 | 10.45 | 0.02 | 15.33 | 0.03 | 13.68 |

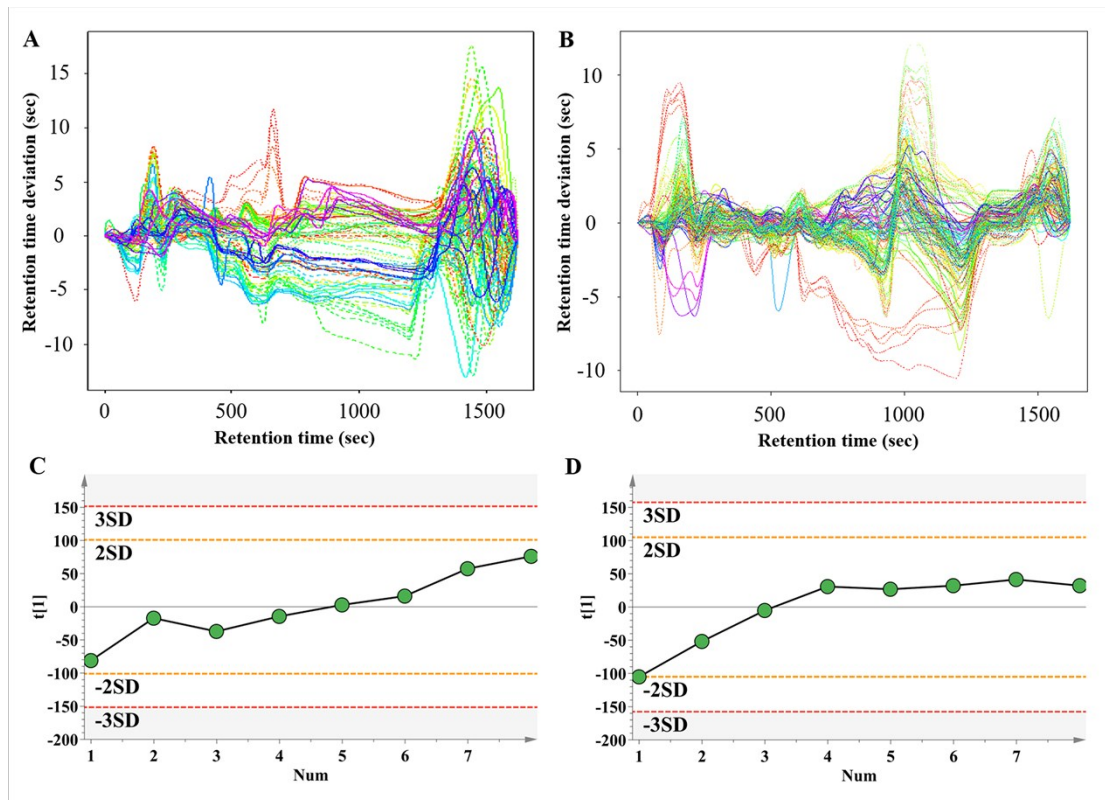

Fig. S1 Retention time deviation plots of all samples from LC-(+) ESI-MS data (A) and LC-(-) ESI-MS data (B), and PCA score plots of all QC samples from LC-(+) ESI-MS data (C) and LC-(-) ESI-MS data (D).

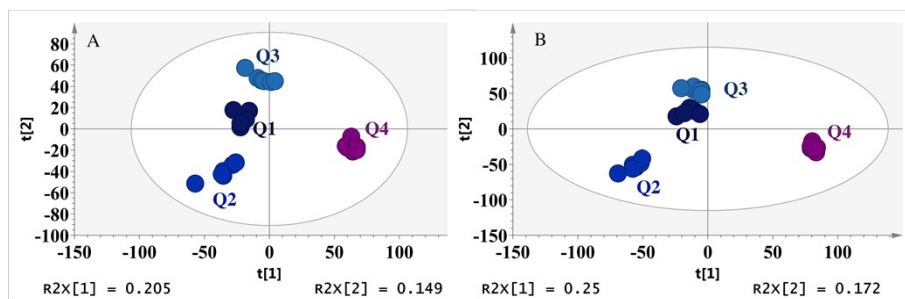

Fig. S2 PCA score plots based on the LC-(+) ESI-MS (A) and LC-(-) ESI-MS (B) data sets for different quenching solvents

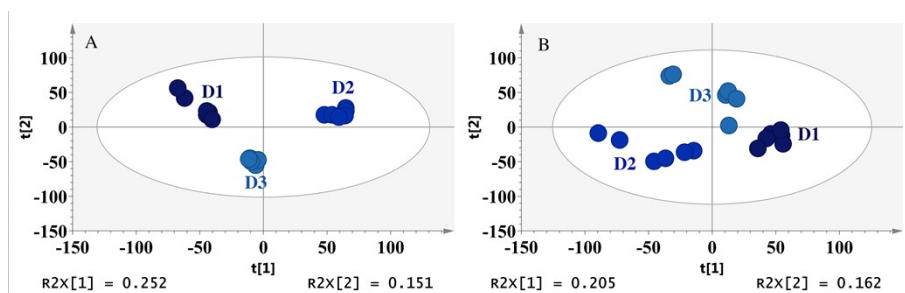

Fig. S3 PCA score plots based on the LC-(+) ESI-MS (A) and LC-(-) ESI-MS (B) data sets for different disruption methods.



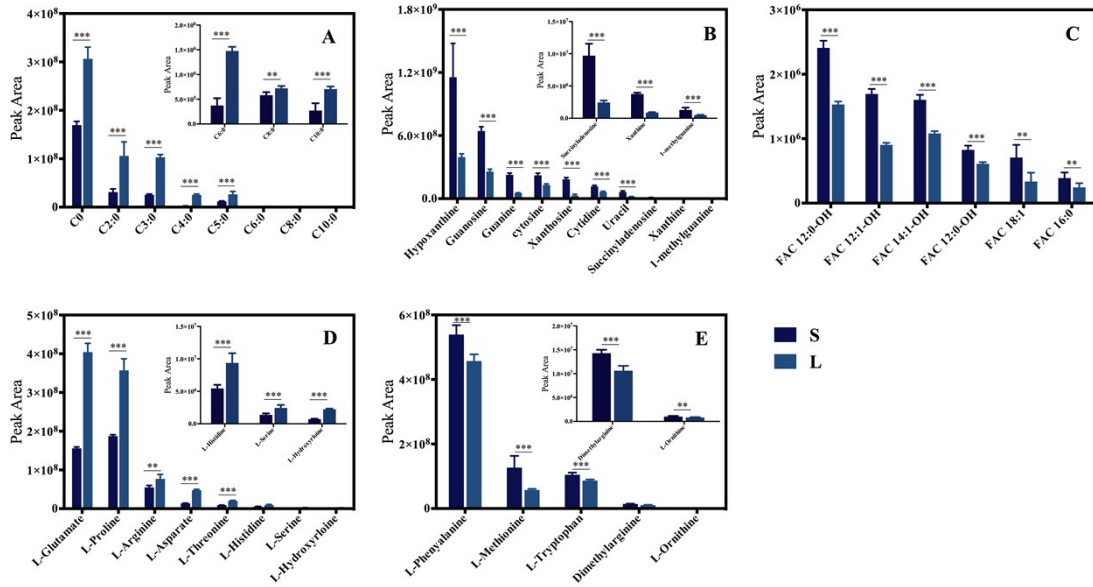

Fig. S4 Comparison of cell samples frozen in liquid nitrogen for 0 days and 10 months (related to Fig.7). (A) Increased carnitines after long-term storage. (B) Decreased nucleosides and nucleobases after long-term storage. (C) Decreased fatty acids after long-term storage. (D) Increased amino acids after long-term storage (E) Decreased amino acids after long-term storage. (n = 6) (A, B, D and E: the insets show an expanded Y-axis for the lower-intensity metabolites in the main panels) L: long-term-storage cell samples (frozen for 10 months in liquid nitrogen). S: immediately processed cell samples (frozen for 0 days in liquid nitrogen). \*\*\* denotes  $p < 0.001$ ; \*\* denotes  $p < 0.01$ ; \* denotes  $p < 0.05$ . Error bars represent standard deviations.

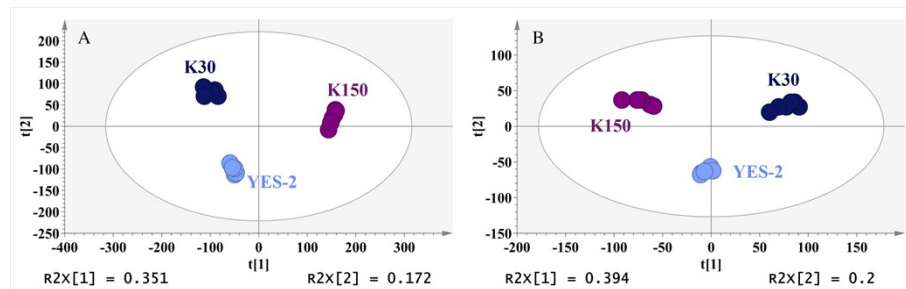

Fig. S5 PCA score plots based on the LC-(+) ESI-MS (A) and LC-(-) ESI-MS (B) data sets for three human esophageal squamous cell carcinoma cell lines
